# Supplementary material for: Hydrophobic nanocoating of cellulose by solventless mechanical milling
Source: Royal Society of Chemistry journal article supplement (doi:10.1039/c6gc00660d), 2016-01-01
Supplement: c6gc00660d1.pdf [file c6gc00660d1.pdf]

## Supporting Information:

### Hydrophobic Nanocoating of Cellulose by Solventless Mechanical milling

Mengmeng Zhao,<sup>a,b</sup> Shigenori Kuga,<sup>a</sup> Min Wu<sup>\*a</sup> and Yong Huang<sup>\*a</sup>

a. Technical Institute of Physics and Chemistry, Chinese Academy of Sciences, 29 Zhongguancun East Road, Haidian District, Beijing 100190, People's Republic of China.

b. University of Chinese Academy of Sciences, Beijing 100039, People's Republic of China.

\* Author for correspondence:

wumin@mail.ipc.ac.cn, Tel: +86-10-82543500; yhuang@mail.ipc.ac.cn, Tel: +86-10-82543478

#### Table of contents:

1. Acid hydrolysis of PTFE-milled cellulose
2. Scherrer Equation (Supporting Information Eq. S1)
3. Supplementary figures

## 1. Acid hydrolysis

Acid hydrolysis of PTFE-milled cellulose: 1 g of 28-h PTFE-milled cellulose was dispersed in 100 ml of 20 wt% H<sub>2</sub>SO<sub>4</sub>, refluxed at 80°C for 2h. The mixture was neutralized, washed with water by filtration and dried. Figure S1 is X-ray diffraction of the product. There was nearly no change in the pattern. SEM-EDS (Figure S2) also showed preservation of cellulose-PTFE composition. These results show that cellulose was protected by the PTFE layer from the harsh acid treatment.

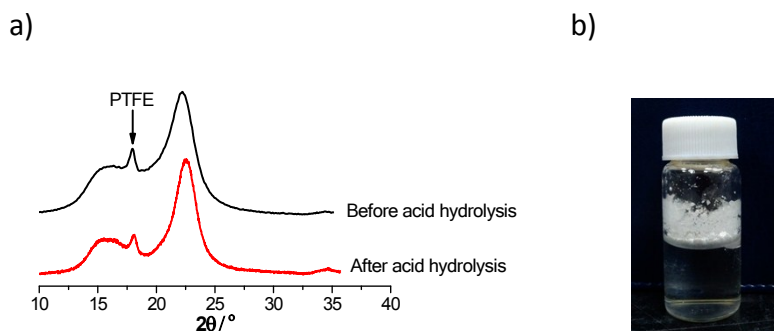

**Figure S1.** a) X-ray diffraction profiles of acid hydrolysis product of PTFE-milled cellulose. Arrow shows major reflection of PTFE. b) Photographs of 28-h PTFE-milled cellulose after acid treatment showing total repulsion from water.

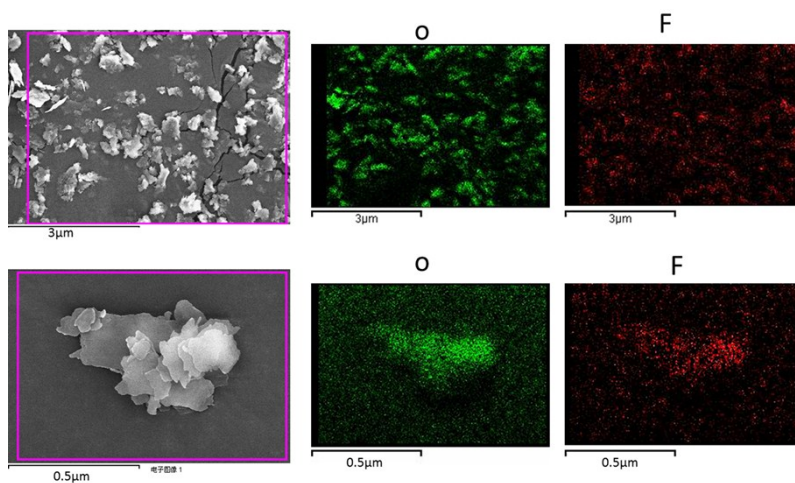

**Figure S2.** Elemental mapping by SEM-EDX of 28-h PTFE-milled cellulose after acid hydrolysis. The O and F signals indicate cellulose and PTFE, respectively. Distribution of O and F match well, indicating continuous PTFE coverage of cellulose remained.

## 2. Scherrer Equation (Supporting Information Eq. S1)

$$D_{hkl} = K\lambda/B\cos\theta \quad (1)$$

Where  $D_{hkl}$  is the dimension of the crystal perpendicular to  $hkl$  plane,  $\theta$  is the diffraction angle,  $\lambda$  is the wavelength of the X-ray radiation (Cu  $K\alpha$ ,  $\lambda = 0.154$  nm), and  $B$  is the full width at half maximum (fwhm) of the diffraction peak.

## 3. Supplementary figures

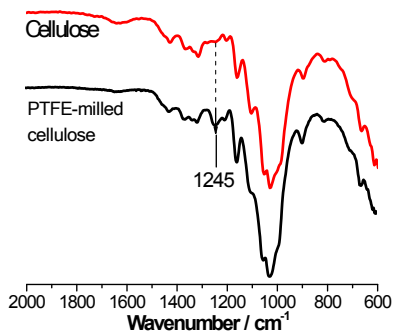

**Figure S3.** ATR-FTIR spectra of cellulose and PTFE-milled cellulose. Note a new peak at 1245 cm<sup>-1</sup> of PTFE-milled cellulose arising from PTFE.

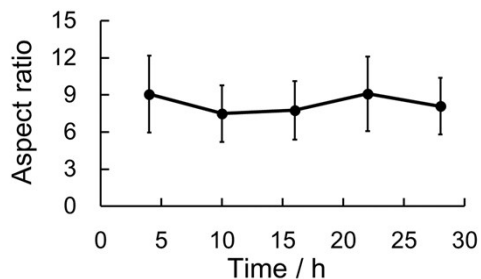

**Figure S4.** Aspect ratio of PTFE-milled cellulose particle (28 h). Width from SEM; thickness from AFM.

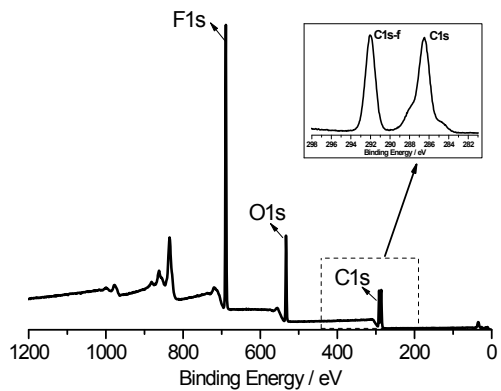

Figure S5. Wide scan XPS spectra of PTFE-milled cellulose for 28h.

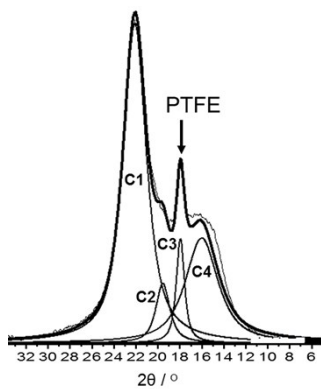

Figure S6. Peak separation of X-ray diffraction of PTFE-milled cellulose for 28 h, C3 is PTFE peak of (100) plane at  $2\theta=18.2^\circ$ .

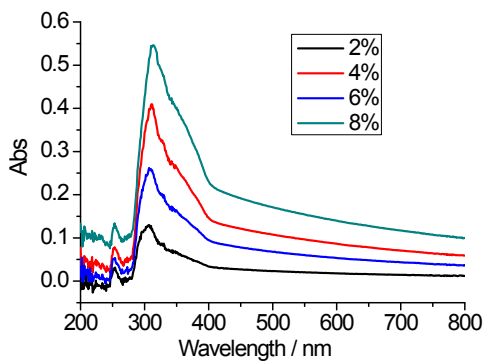

Figure S7. UV-VIS spectra of Vaseline with different content of PTFE-milled cellulose.
